# Supplementary material
Source: PubMed Central journal article supplement (PMC3288020)

# Supplementary Figure 1.

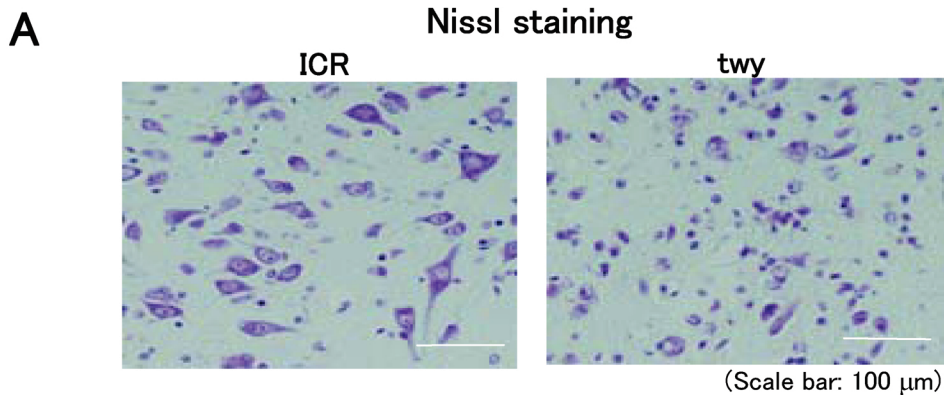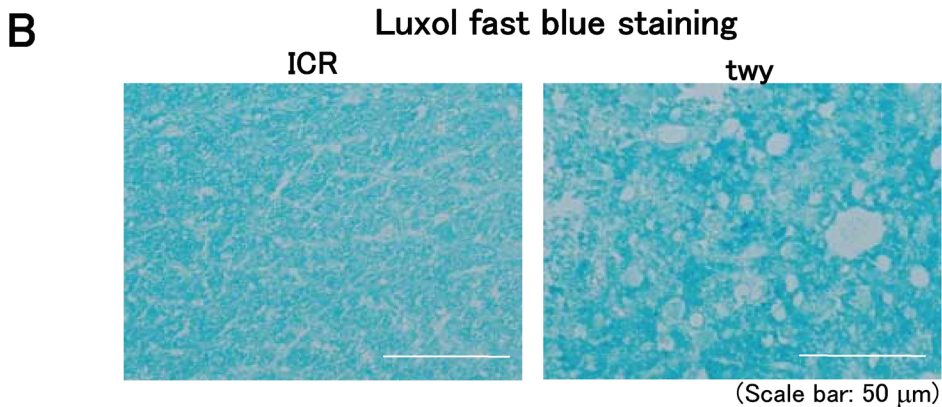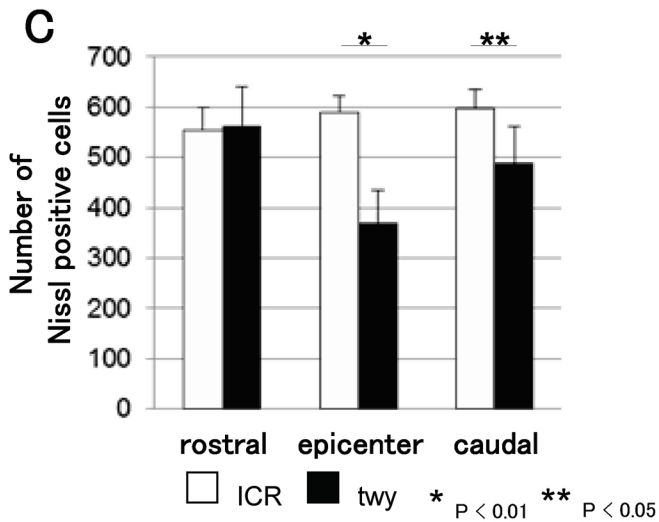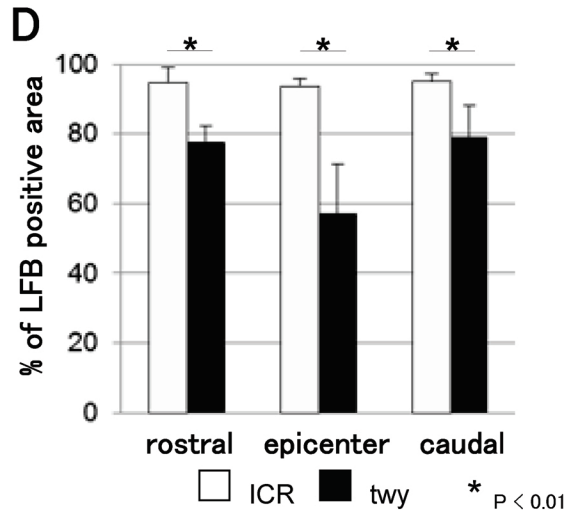

# Supplementary Figure 2.

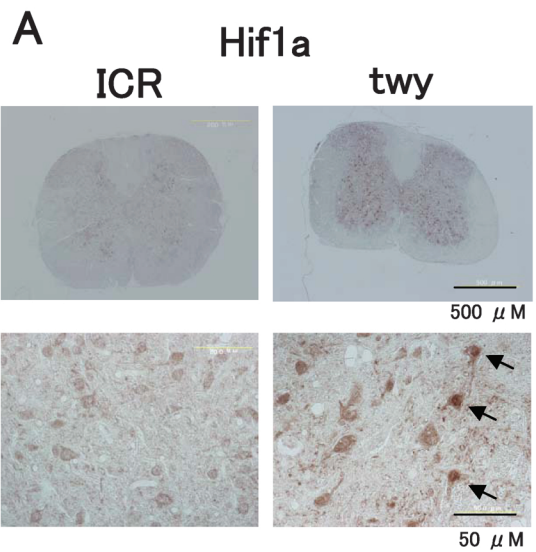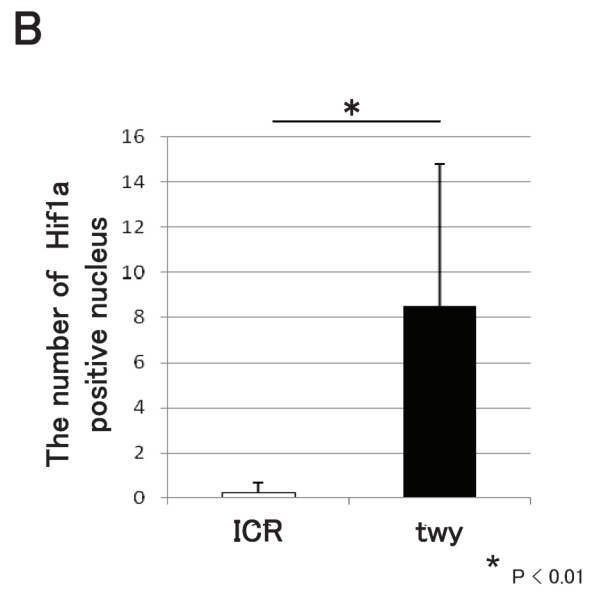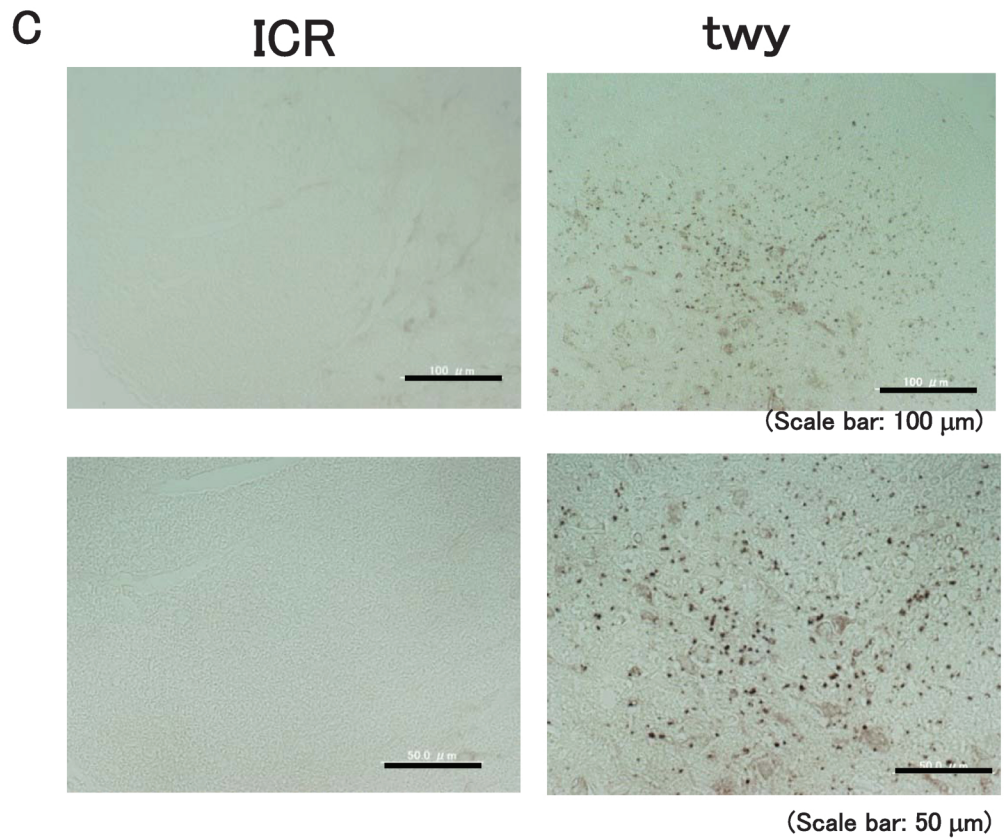

# Supplementary Figure 3.

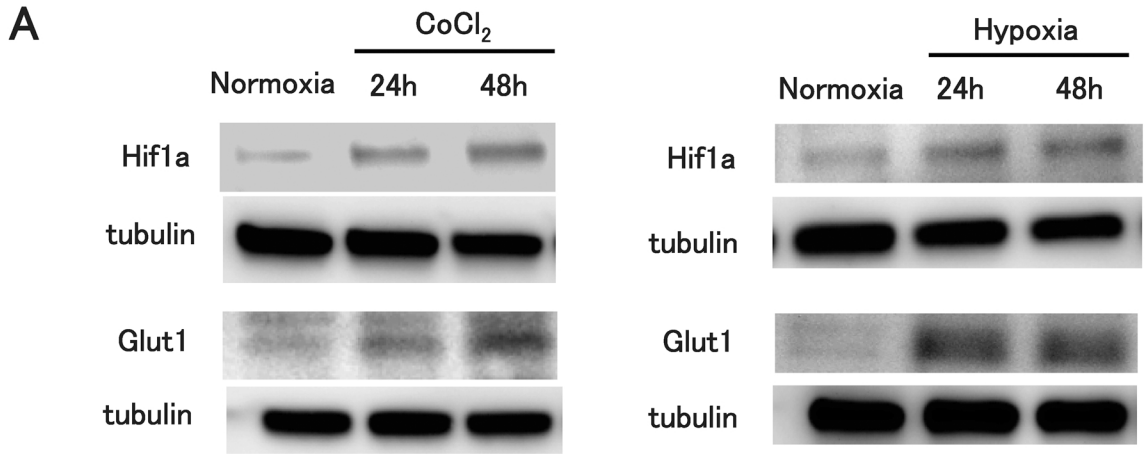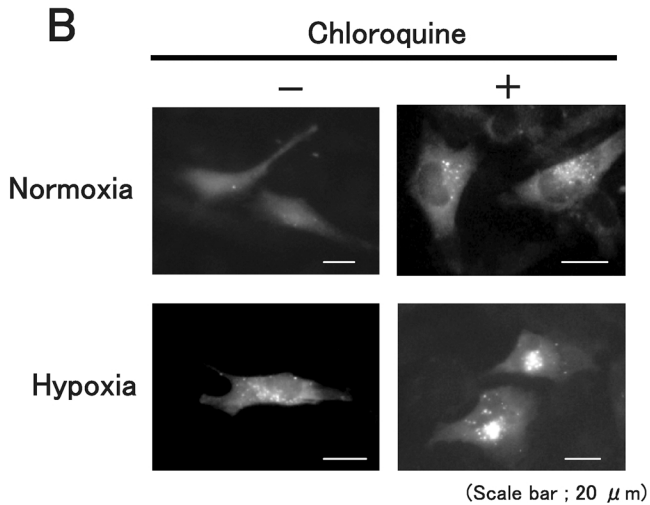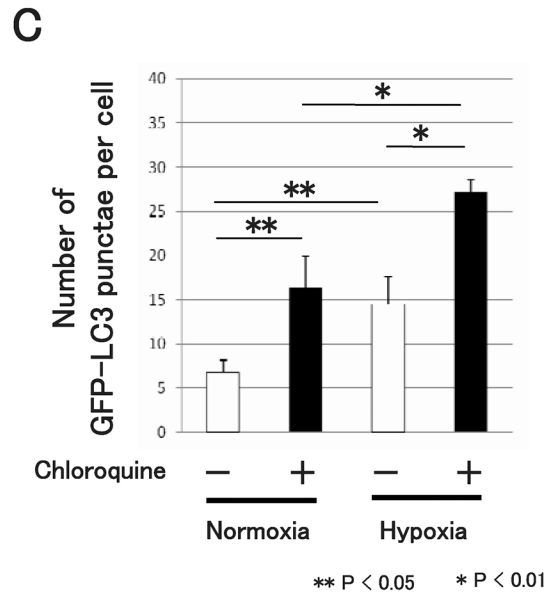

Supplement: autophagy-7-1462-s01.pdf [file autophagy-7-1462-s01.pdf]
